# Supplementary material for: Single-Dose Intranasal Administration of AdCOVID Elicits Systemic and Mucosal Immunity against SARS-CoV-2 and Fully Protects Mice from Lethal Challenge
Source: MDPI journal article supplement (doi:10.3390/vaccines9080881), 2021-08-09
Supplement: s1 [file s1]

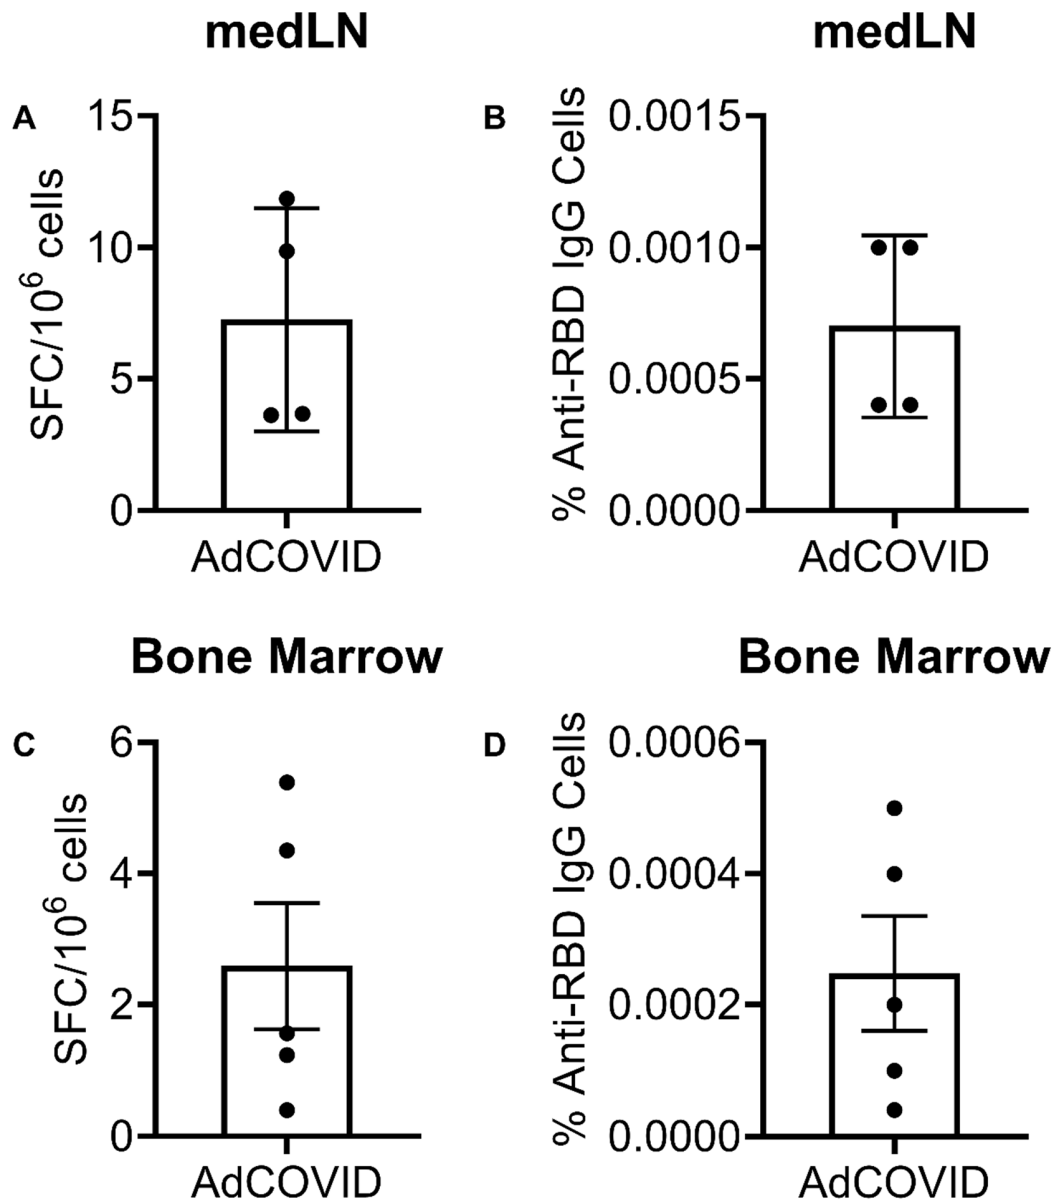

**Figure S1.** A single intranasal dose of AdCOVID generates long-lived anti-RBD IgG-secreting B cell populations in the periphery. C57BL/6J mice (n=10) received a single intranasal administration of AdCOVID at a dose of 3.78E+08 ifu on day 0. Mice were euthanized on day 193 and (A, B) medLN or (C, D) bone marrow were harvested for B cell ELISpot. Results are expressed as (A, C) Spot Forming Cells (SFC) per million input cells or (B, D) frequency of RBD-specific IgG-secreting cells isolated. Data are the mean response +/- SD.

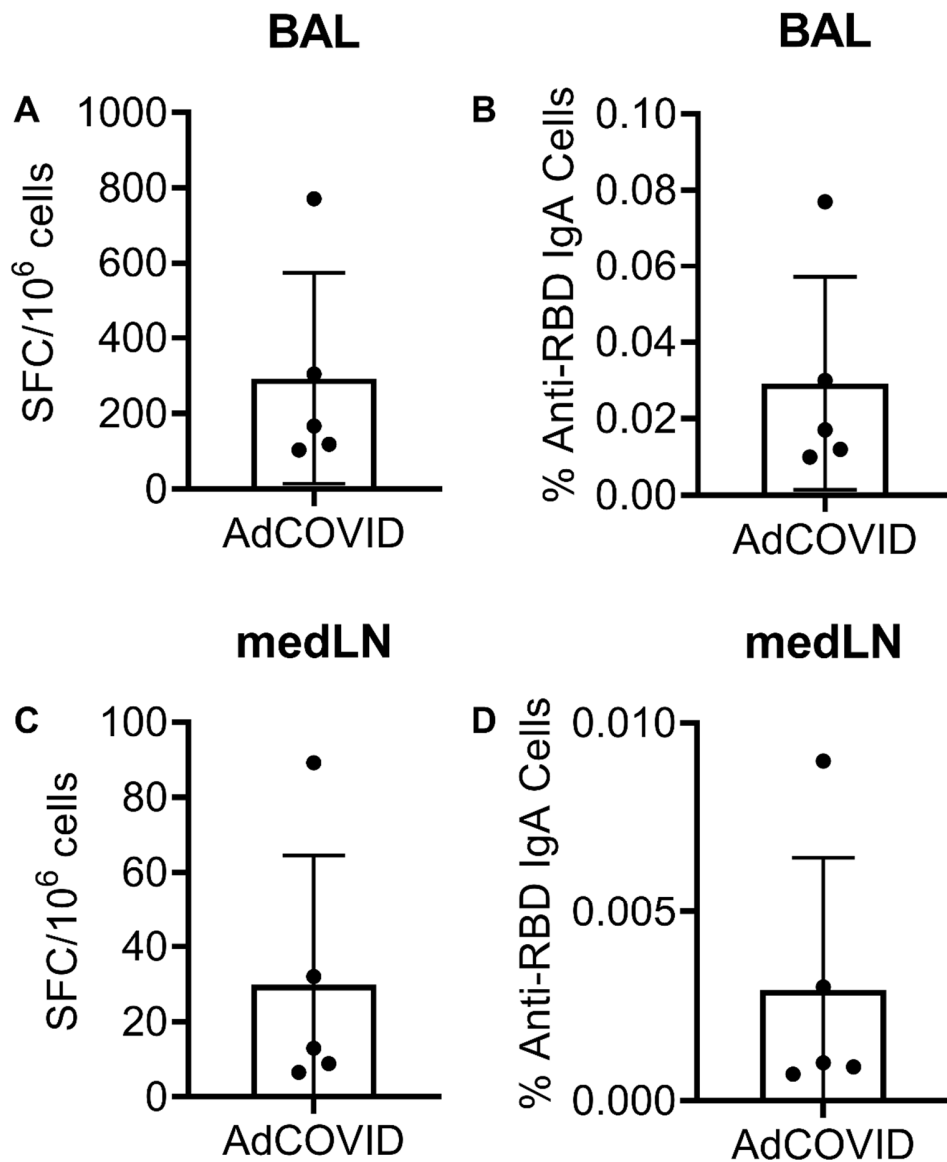

**Figure S2.** A single intranasal dose of AdCOVID generates long-lived anti-RBD IgA-secreting B cell populations. C57BL/6J mice (n=5) received a single intranasal administration of AdCOVID at a dose of 3.78E+08 ifu on day 0 and were euthanized on day 180. Cells were isolated from the (A, B) BAL and (C, D) medLN for analysis by B cell ELISpot. Results are expressed as (A, C) Spot Forming Cells (SFC) per million input cells or (B, D) frequency of RBD-specific IgA-secreting cells isolated. Data are the mean response  $\pm$  SD.

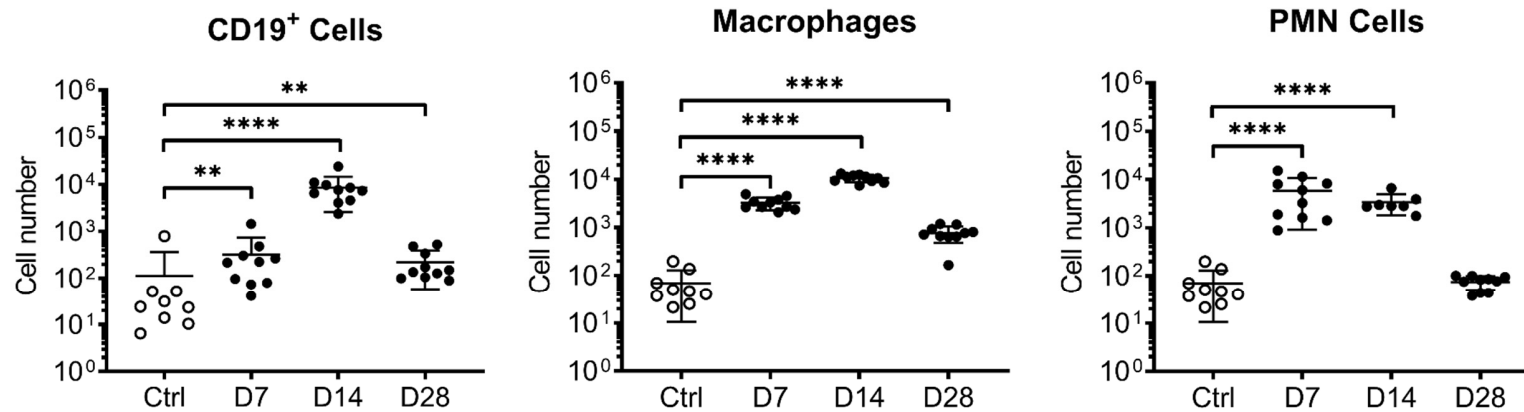

**Figure S3.** Flow cytometry analysis of immune cells in BAL from C57BL/6J mice following intranasal vaccination with a single dose of AdCOVID. C57BL/6J mice were given a single intranasal administration of vehicle (Ctrl) or 3.35E+08 ifu AdCOVID (high dose). BAL cells were collected from vaccinated animals at the indicated timepoints (10 mice/timepoint) and analyzed individually by flow cytometry as described in the Materials and Methods. Results are expressed as cell number. Data are mean response  $\pm$  SD. Statistical analysis was performed with a Mann-Whitney test: \*\*,  $P < 0.01$ ; \*\*\*\*,  $P < 0.0001$ .

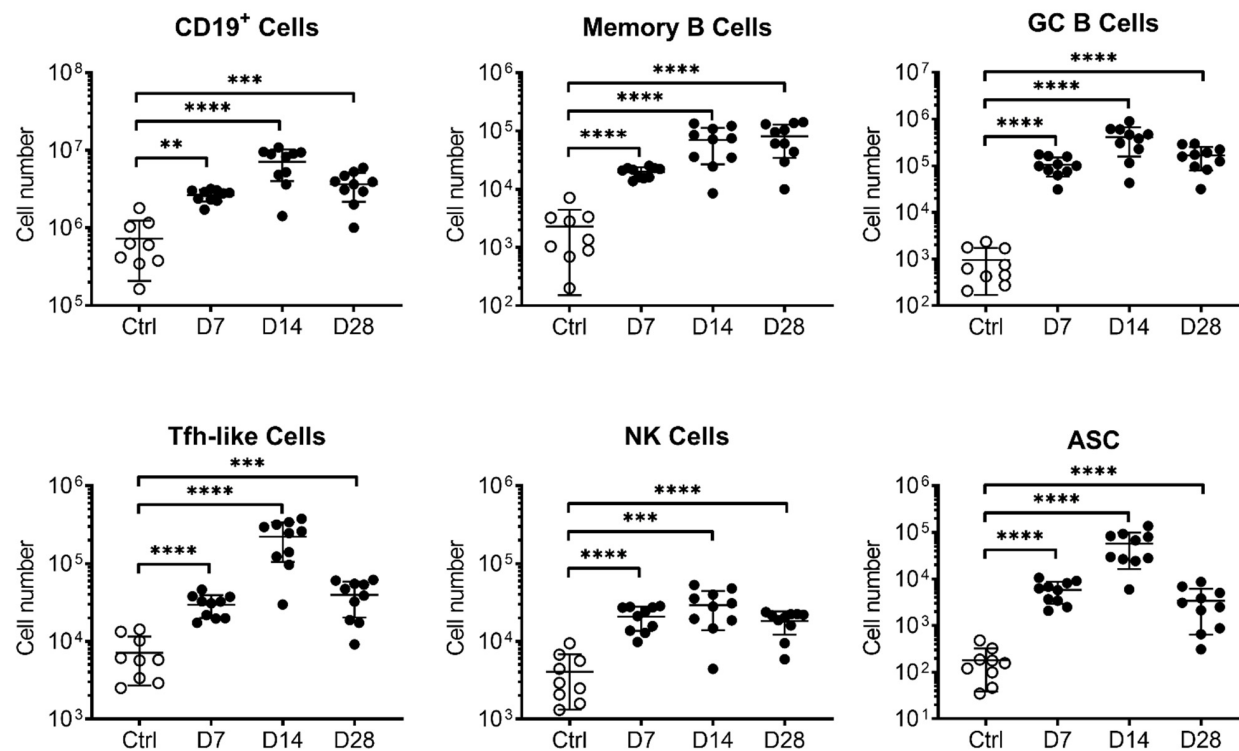

**Figure S4.** Flow cytometry analysis of immune cells in medLN nodes from C57BL/6J mice following intranasal vaccination with a single dose of AdCOVID. C57BL/6J mice were given a single intranasal administration of vehicle (Ctrl) or  $3.35 \times 10^8$  ifu AdCOVID (high dose). medLN cells were isolated from vaccinated animals at the indicated timepoints (10 mice/timepoint) and analyzed individually by flow cytometry as described in the Materials and Methods. Results are expressed as cell number. Data are mean response  $\pm$  SD. Statistical analysis was performed with Mann-Whitney test: \*\*,  $P < 0.01$ ; \*\*\*,  $P < 0.001$ ; \*\*\*\*,  $P < 0.0001$ .

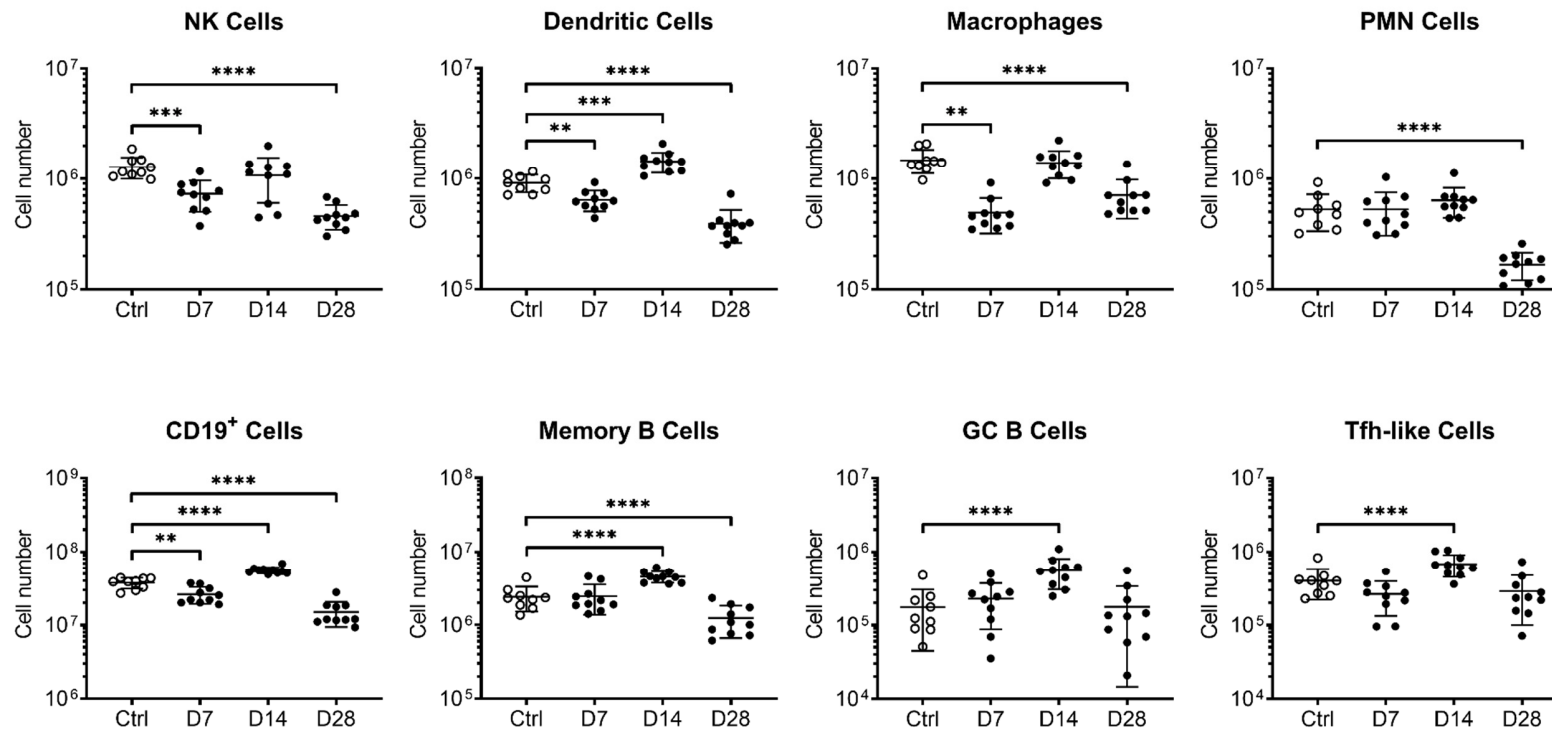

**Figure S5.** Flow cytometry analysis of immune cells in spleens from C57BL/6J mice following intranasal vaccination with a single dose of AdCOVID. C57BL/6J mice were given a single intranasal administration of vehicle (Ctrl) or 3.35E+08 ifu AdCOVID (high dose). Splenocytes were collected from vaccinated animals at the indicated timepoints (10 mice/timepoint) and analyzed individually by flow cytometry as described in the Materials and Methods. Results are expressed as cell number. Data are mean response  $\pm$  SD. Statistical analysis was performed with Mann-Whitney test: \*\*,  $P < 0.01$ ; \*\*\*,  $P < 0.001$ ; \*\*\*\*,  $P < 0.0001$

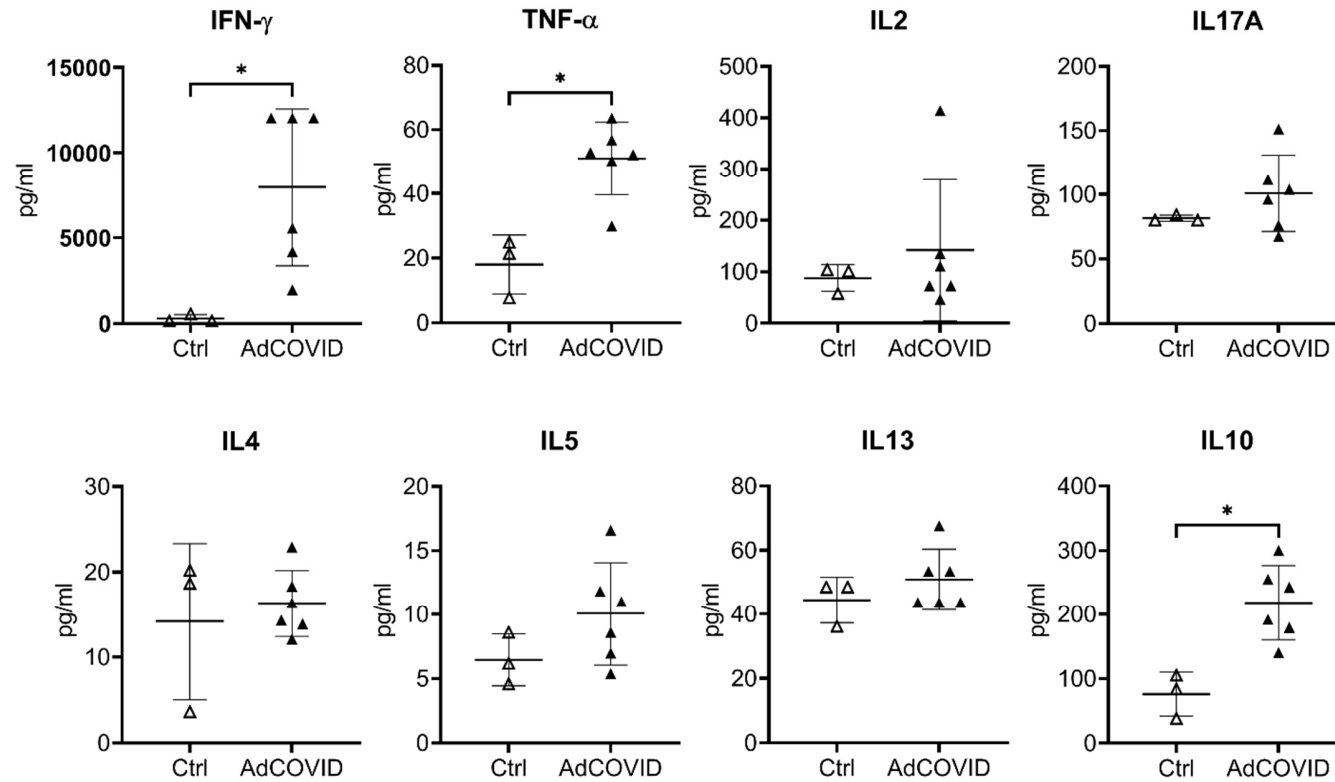

**Figure S6.** Intranasal AdCOVID vaccination does not elicit a Th<sub>2</sub> or Th<sub>17</sub>-biased immune response. CD-1 mice were given a single intranasal administration of vehicle (Ctrl) or 3.78E+08 ifu AdCOVID. Splenocytes (n= 10 mice/vaccine, 3 mice/control) were isolated at day 10 and re-stimulated with the RBD peptide pool for 48 hours. Secreted cytokines were detected in the supernatant using a cytokine multiplex assay. Results are expressed in pg/mL. Different Y-axis scales are used across the graphics. Data are mean response  $\pm$  SD. Statistical analysis was performed with a Mann-Whitney test: \*,  $P < 0.05$ .

**Table S1.** Flow Cytometry Cellular Markers

| Cell Type                      | Cellular Markers                                                                                                     |
|--------------------------------|----------------------------------------------------------------------------------------------------------------------|
| CD4 T Cell                     | CD3 <sup>+</sup> CD4 <sup>+</sup>                                                                                    |
| CD8 T Cell                     | CD3 <sup>+</sup> CD8 <sup>+</sup>                                                                                    |
| T Follicular Helper-like (Tfh) | CD4 <sup>+</sup> CD25 <sup>lo</sup> CXCR5 <sup>+</sup> PD-1 <sup>hi</sup>                                            |
| CD19 B Cell                    | CD19 <sup>+</sup> CD138 <sup>neg</sup>                                                                               |
| Memory B Cell                  | CD19 <sup>+</sup> IgD <sup>neg</sup> CD38 <sup>+</sup> Fas <sup>neg</sup>                                            |
| Germinal Center B Cell (GC)    | CD19 <sup>+</sup> IgD <sup>neg</sup> CD38 <sup>lo</sup> Fas <sup>+</sup>                                             |
| Antibody Secreting Cells (ASC) | CD19 <sup>lo</sup> CD38 <sup>lo</sup> CD138 <sup>hi</sup>                                                            |
| Natural Killer (NK)            | CD3 <sup>neg</sup> NK1.1 <sup>+</sup>                                                                                |
| Polymorphonuclear (PMN)        | Ly6G <sup>hi</sup>                                                                                                   |
| Macrophage                     | Ly6G <sup>neg</sup> CD11b <sup>+</sup> CD64 <sup>hi</sup>                                                            |
| Dendritic Cell                 | Ly6H <sup>neg</sup> CD64 <sup>lo/neg</sup> MHCII <sup>+</sup> CD11c <sup>+</sup>                                     |
| BAL CD19 B cell                | Autof <sup>neg</sup> Ly6G <sup>neg</sup> CD64 <sup>neg</sup> CD4 <sup>neg</sup> CD8 <sup>neg</sup> CD19 <sup>+</sup> |
| BAL CD4 T cell                 | Autof <sup>neg</sup> Ly6G <sup>neg</sup> CD64 <sup>neg</sup> CD4 <sup>+</sup>                                        |
| BAL CD8 T cell                 | Autof <sup>neg</sup> Ly6G <sup>neg</sup> CD64 <sup>neg</sup> CD8 <sup>+</sup>                                        |
| Alveolar macrophage (AM)       | Autof <sup>+</sup> Ly6G <sup>neg</sup> CD64 <sup>neg</sup> CD11c <sup>+</sup>                                        |

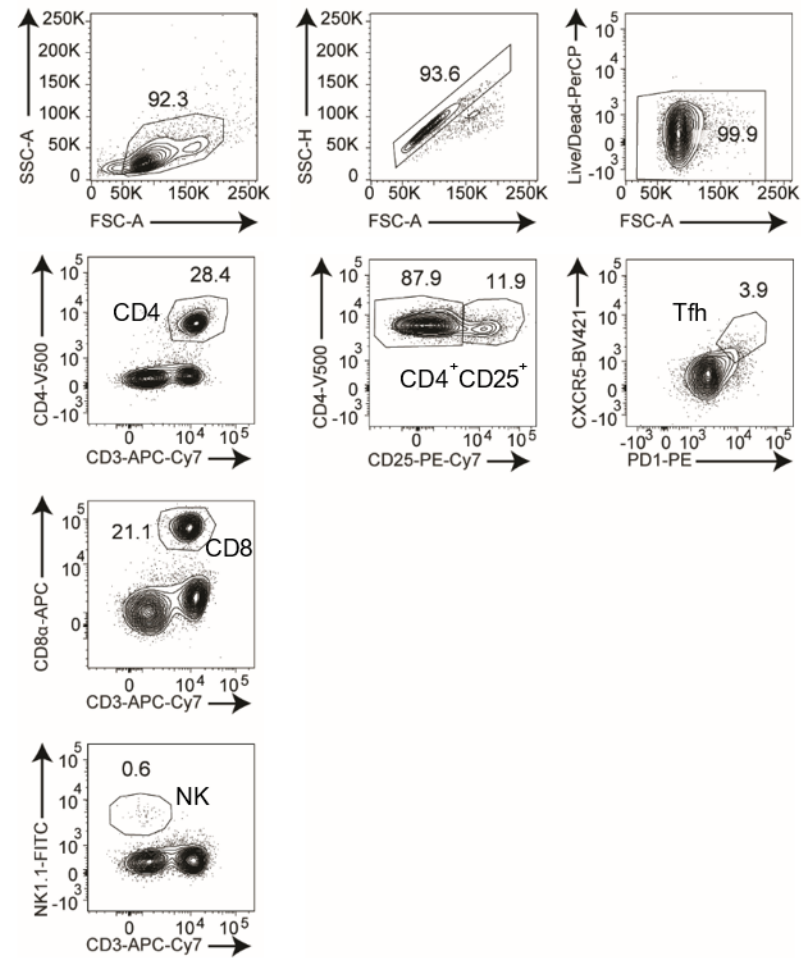

**Figure S7.** Representative flow cytometry plots for gating of T cells isolated from mice. Gating strategy to identify CD3<sup>+</sup>CD4<sup>+</sup> (CD4<sup>+</sup> T cells), CD3<sup>+</sup>CD8<sup>+</sup> (CD8<sup>+</sup> T cells), CD3<sup>neg</sup>NK1.1<sup>+</sup> (NK cells), CD25<sup>+</sup> CD4 T cells and CXCR5<sup>+</sup>PD-1<sup>hi</sup> T follicular helper-like cells (Tfh).



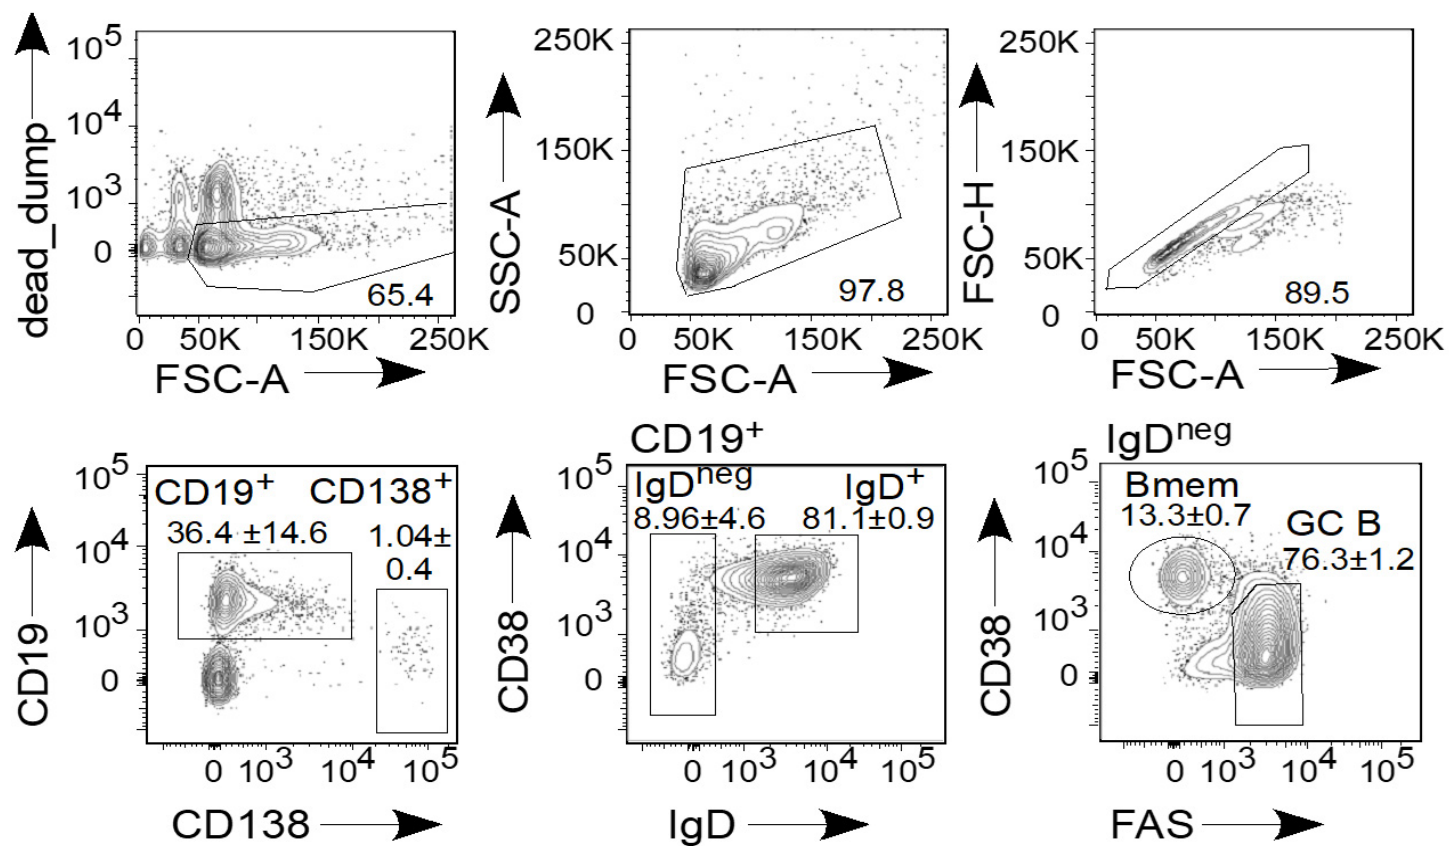

**Figure S8.** Representative flow cytometry plots for gating of B cells isolated from mice. Gating strategy to identify total CD19<sup>+</sup> B cells, CD19<sup>lo</sup>CD138<sup>hi</sup> antibody secreting cells (ASCs), IgD<sup>+</sup> naïve B cells, IgD<sup>neg</sup> antigen-experienced B cells, IgD<sup>neg</sup>CD38<sup>+</sup>Fas<sup>neg</sup> memory B cells (Bmem) and IgD<sup>neg</sup>CD38<sup>lo</sup>Fas<sup>+</sup> germinal center (GC) B cells.

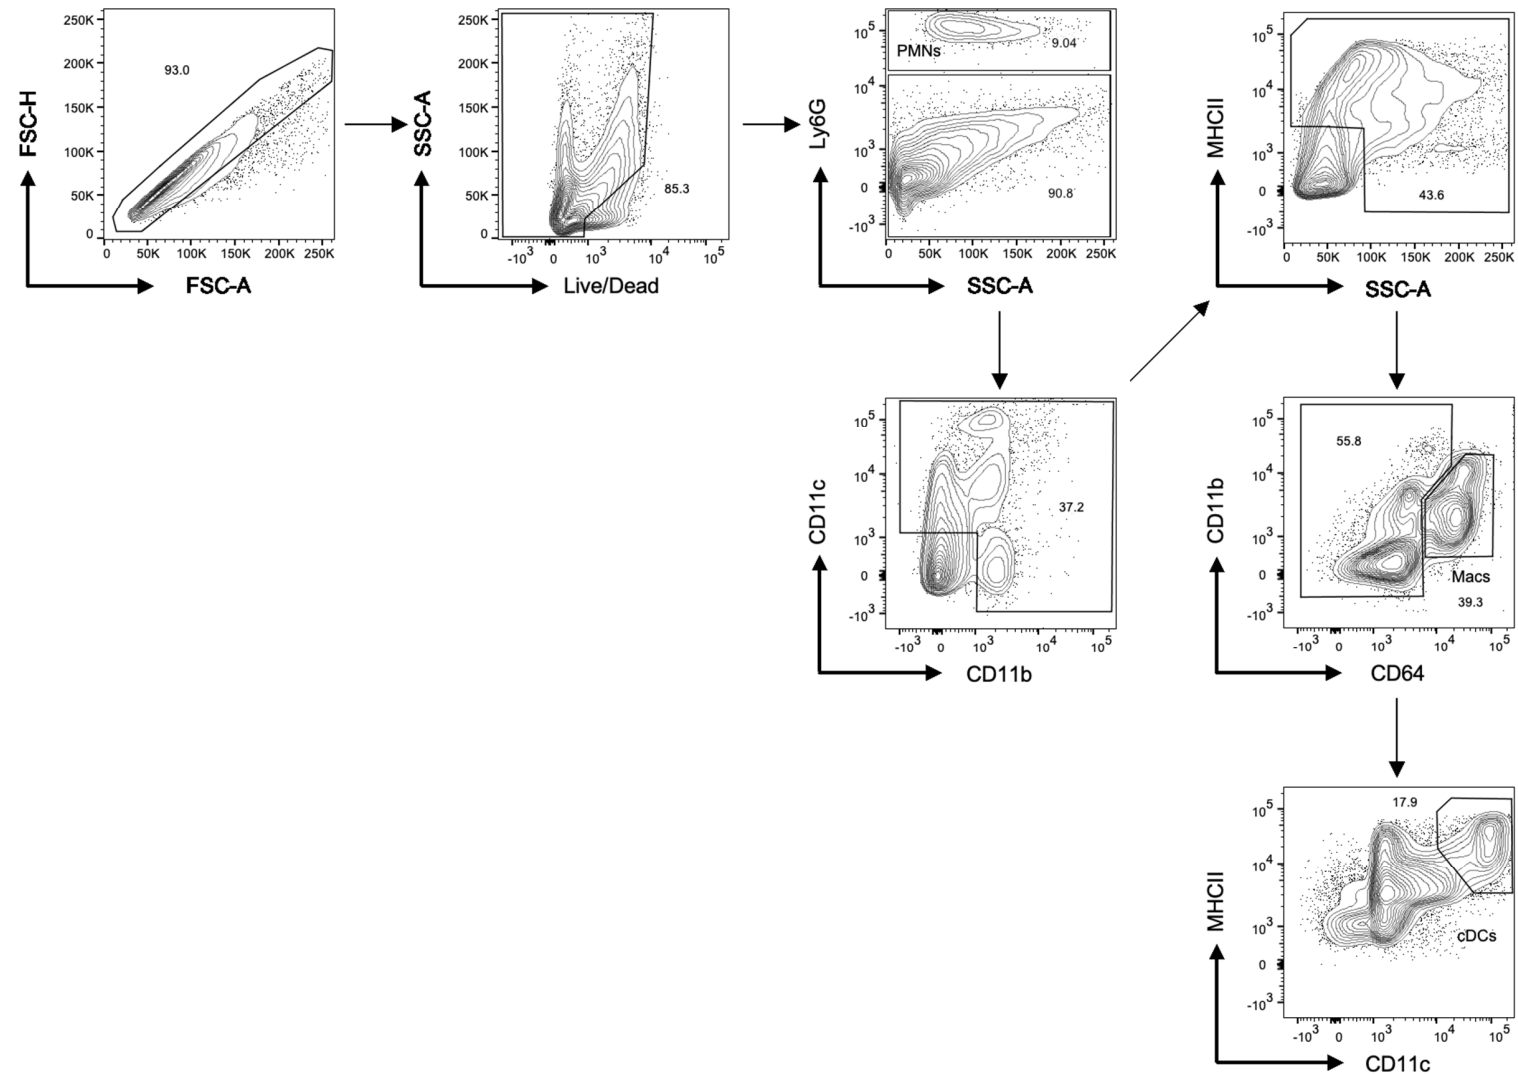

**Figure S9.** Representative flow cytometry plots for gating of myeloid cells isolated from mice. Gating strategy to identify Ly6G<sup>hi</sup> neutrophils (PMN), CD11b<sup>+</sup>CD64<sup>hi</sup> macrophages, and MHCII<sup>+</sup>CD11c<sup>+</sup> dendritic cells (cDCs).

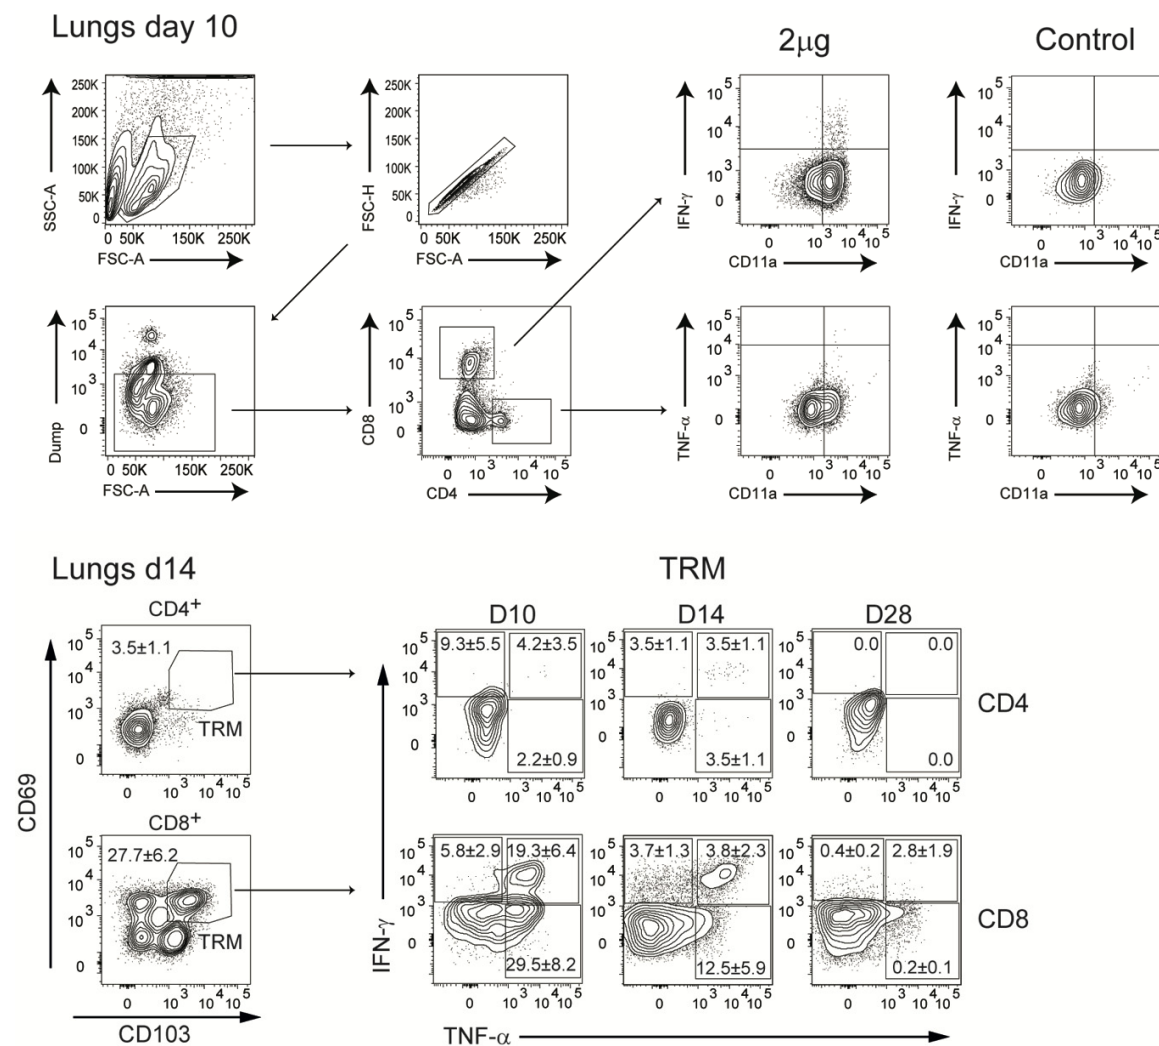

**Figure S10.** Representative flow cytometry plots for gating of lung Trm cells isolated from mice. Gating strategy to identify cytokine (IFN-γ and TNF-α) producing CD11a<sup>+</sup> or CD69<sup>+</sup>CD103<sup>+</sup> resident memory (Trm) CD4<sup>+</sup> and CD8<sup>+</sup> cells.

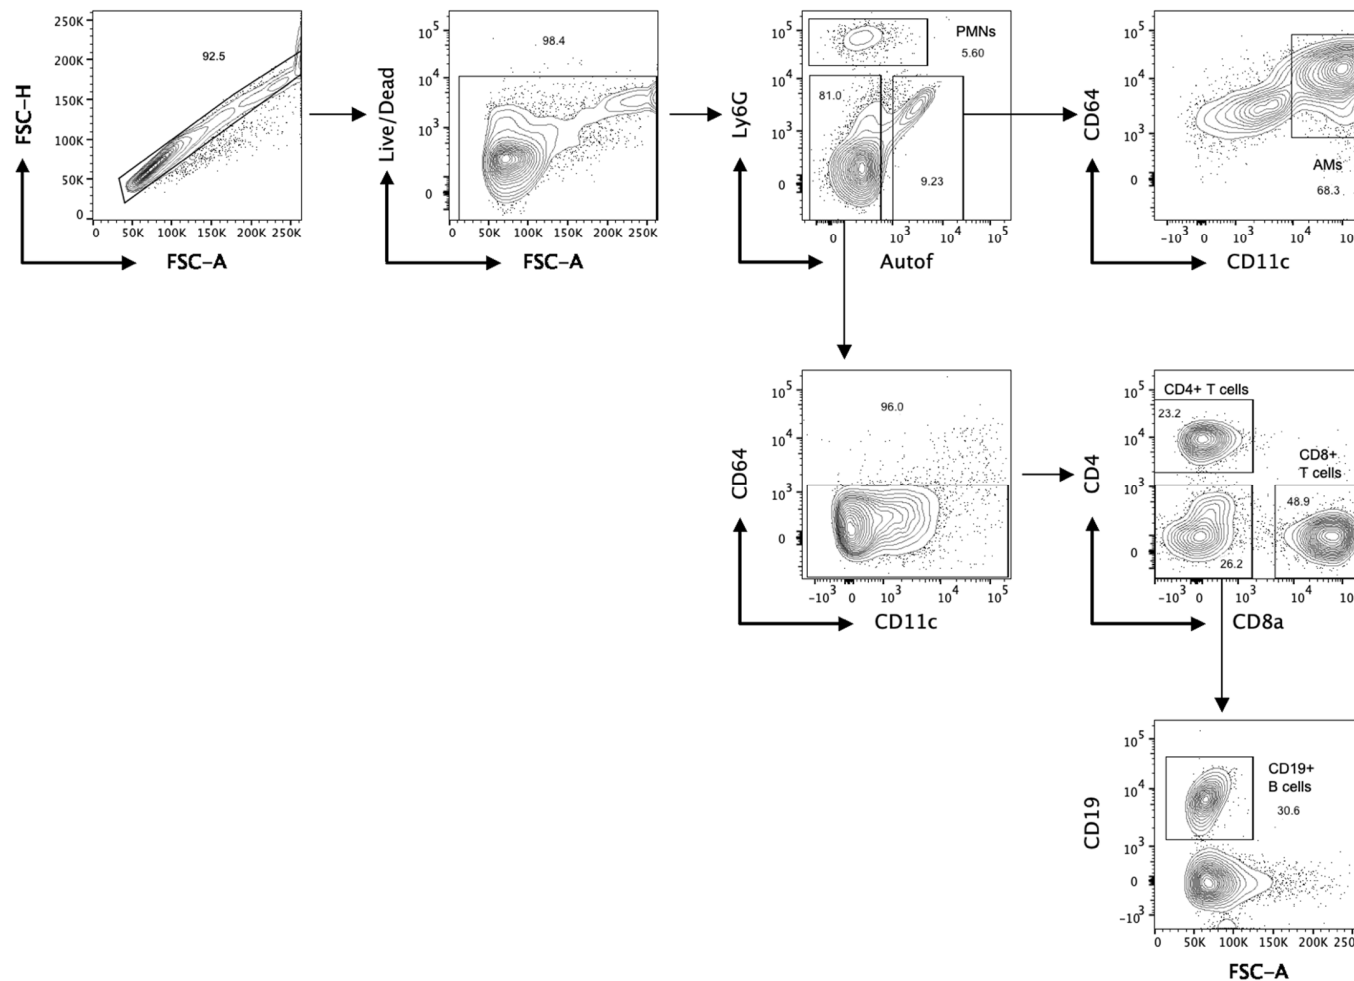

**Figure S11.** Representative flow cytometry plots for gating of BAL cells isolated from mice. Gating strategy to identify  $\text{Autof}^+\text{CD11c}^+\text{CD64}^+$  alveolar macrophages (AMs),  $\text{CD4}^+$  T cells,  $\text{CD8}^+$  T cells or  $\text{CD19}^+$  B cells in the bronchoalveolar (BAL) compartment.
